# Supplementary material for: Dynamic Roles for Small RNAs and DNA Methylation during Ovule and Fiber Development in Allotetraploid Cotton
Source: PubMed Central journal article supplement (PMC4692501; doi:10.1371/journal.pgen.1005724), 2015-12-28
Supplement: pgen.1005724.s002.pdf [file pgen.1005724.s002.pdf]

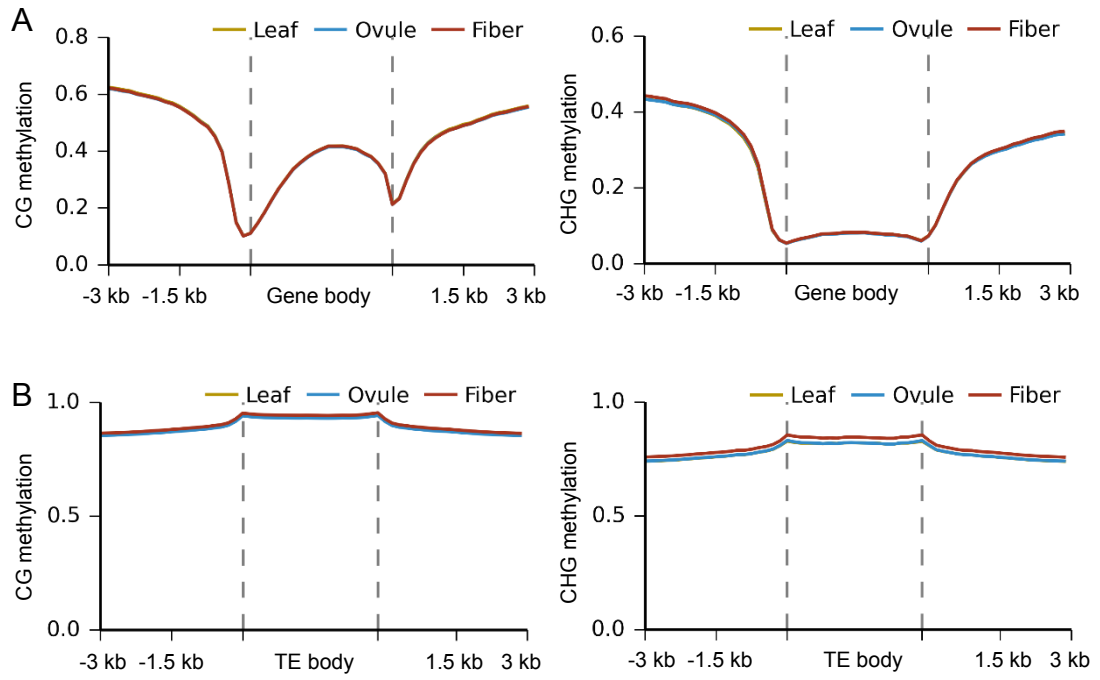

**S2 Fig. Distribution of CG and CHG methylation in gene and TE.** (A) Distribution of CG and CHG methylation in gene region. (B) Distribution of CG and CHG methylation in TE region.
