# Supplementary material for: Dynamic Roles for Small RNAs and DNA Methylation during Ovule and Fiber Development in Allotetraploid Cotton
Source: PubMed Central journal article supplement (PMC4692501; doi:10.1371/journal.pgen.1005724), 2015-12-28
Supplement: pgen.1005724.s003.pdf [file pgen.1005724.s003.pdf]

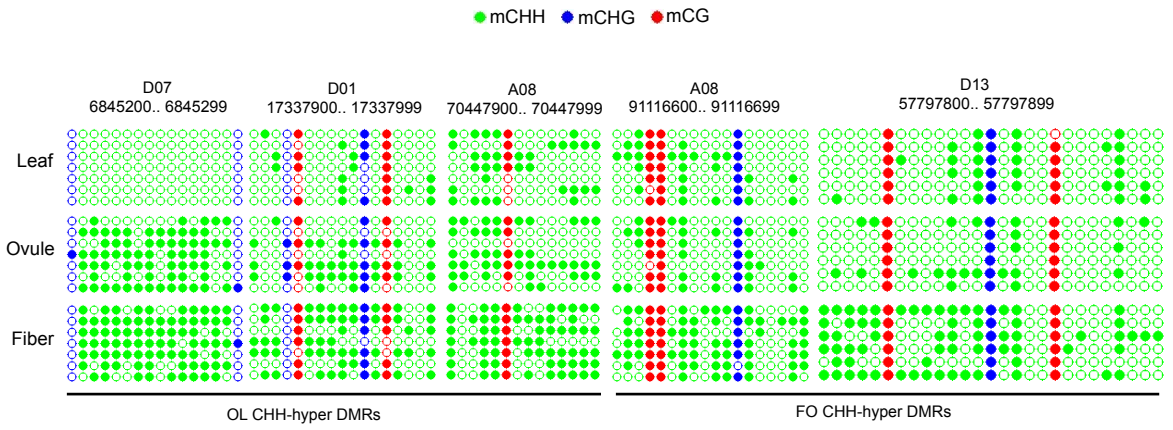

**S3 Fig. Bisulfite sequencing results of randomly selected DMRs.**
