# Supplementary material for: Dynamic Roles for Small RNAs and DNA Methylation during Ovule and Fiber Development in Allotetraploid Cotton
Source: PubMed Central journal article supplement (PMC4692501; doi:10.1371/journal.pgen.1005724), 2015-12-28
Supplement: pgen.1005724.s005.pdf [file pgen.1005724.s005.pdf]

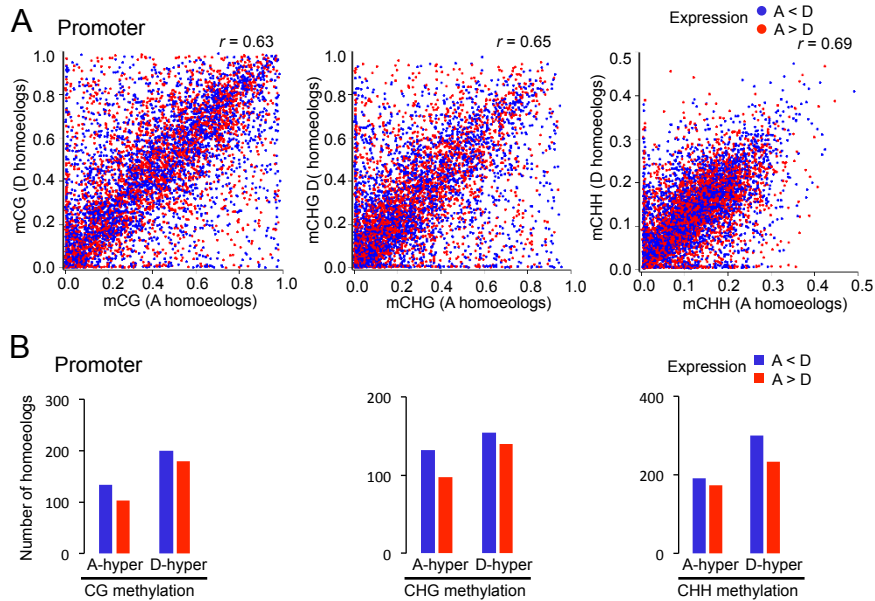

**S5 Fig. DNA methylation differences in promoters of homoeologous genes.** (A) Pairwise plots of CG (left), CHG (middle), and CHH (right) methylation levels (Y-axis, D homoeologs; X-axis, A homoeologs) in promoter regions (2-kb) of homoeologous genes. Blue and red dots indicate the expression level of an A homoeolog that is lower and higher than that of the corresponding D homoeolog, respectively. Spearman correlation coefficient ( $r$ ) is shown. (B) Number of homoeologous genes that were differentially methylated in CG (left), CHG (middle), and CHH (right) sites in promoter regions and showed expression differences (A<D, blue; A>D, red). The levels of CG (>0.4), CHG (>0.4), and CHH (>0.1) methylation difference and fold-changes of expression (>2-fold) between A and D homoeologs were used as cut-off values.
